# Supplementary material for: How human location-specific contact patterns impact spatial transmission between populations?
Source: PubMed Central journal article supplement — Sci Rep. 2013 Mar 19;3:1468. doi: 10.1038/srep01468 (PMC3601479; doi:10.1038/srep01468), 2013-03-19
Supplement: srep01468-s1.pdf [file srep01468-s1.pdf]

# How human location-specific contact patterns impact spatial transmission between populations?

## Supplementary Information

Lin Wang<sup>1</sup>, Zhen Wang<sup>2,3</sup>, Yan Zhang<sup>1</sup>, Xiang Li<sup>1\*</sup>

<sup>1</sup>Adaptive Networks and Control Laboratory, Department of Electronic Engineering, Fudan University, Shanghai 200433, PR China

<sup>2</sup>Department of Physics, Hong Kong Baptist University, Kowloon Tong, Hong Kong SAR, China

<sup>3</sup> Center for Nonlinear Studies and the Beijing-Hong Kong-Singapore Joint Center for Nonlinear and Complex Systems (Hong Kong), Hong Kong Baptist University, Kowloon Tong, Hong Kong SAR, China

Author for correspondence: lix@fudan.edu.cn

### The population dynamics at the equilibrium

Given a diffusion rate  $\sigma$  and a return rate  $\tau$ , we obtain a basic set of rate equations governing the population dynamics by the mean-field approximation. The rate equations describing the population evolution of subgroups  $N_{xx}$  and  $N_{xy}$  are

$$\frac{dN_{xx}}{dt} = -\sigma N_{xx}(t) + \tau N_{xy}(t), \quad (\text{S1})$$

$$\frac{dN_{xy}}{dt} = \sigma N_{xx}(t) - \tau N_{xy}(t). \quad (\text{S2})$$

The first equation describes the change of population in subgroup  $N_{xx}$  as the net balance of individuals departing from or returning to their own resident subpopulation  $x$  per unit time. The second equation accounts for the variation of population in subgroup  $N_{xy}$  by the net balance of residents of subpopulation  $x$  that move to or return from subpopulation  $y$ . Since the population size of residents of subpopulation  $x$  is

$$N_x^* = N_{xx}(t) + N_{xy}(t),$$

we have

$$\frac{dN_{xx}}{dt} + (\sigma + \tau)N_{xx}(t) = N_x^*\tau,$$

whose solution is

$$N_{xx}(t) = \frac{N_x^*}{1 + \sigma/\tau} + C_{xx} \exp[-(\tau + \sigma)t].$$

Since the constant  $C_{xx}$  subjects to the initial condition,  $N_{xx}(0) = N_x^*$ , we have

$$N_{xx}(t) = \frac{N_x^*}{1 + \sigma/\tau} + (N_{xx}(0) - \frac{N_x^*}{1 + \sigma/\tau}) \exp[-(\tau + \sigma)t].$$

Similarly, Eq. (S2) yields

$$N_{xy}(t) = \frac{N_x^*}{1 + \sigma/\tau} \sigma/\tau - (N_{xx}(0) - \frac{N_x^*}{1 + \sigma/\tau}) \exp[-(\tau + \sigma)t] \\ + \left[ N_{xy}(0) + N_{xx}(0) - \frac{N_x^*}{1 + \sigma/\tau} (1 + \sigma/\tau) \right] \exp(-\tau t).$$

The relaxation times of  $N_{xx}(t)$  and  $N_{xy}(t)$  to their equilibria are determined by  $(\tau + \sigma)^{-1}$  and  $\tau^{-1}$ , respectively. When  $\tau \gg \sigma$ , which accords with the case in reality, the characteristic relaxation time is determined by  $\tau^{-1}$ . When  $t \gg \tau^{-1}$ , the population sizes  $N_{xx}(t)$  and  $N_{xy}(t)$  can be approximated by their equilibria,

$$N_{xx}^{eq} = \frac{N_x^*}{1 + \sigma/\tau}, N_{xy}^{eq} = \frac{N_x^*}{1 + \tau/\sigma}. \quad (\text{S3})$$

Similarly, for the individuals from subpopulation  $y$ , we have

$$N_{yy}^{eq} = \frac{N_y^*}{1 + \sigma/\tau}, N_{yx}^{eq} = \frac{N_y^*}{1 + \tau/\sigma}. \quad (\text{S4})$$

## The rate equations describing the contagion process in each subgroup

With the mean-field approximation, the contagion process in subgroup  $N_{xx}$  with any of the two contact scenarios can be delineated by the rate equation:

$$\frac{dI_{xx}}{dt} = -\sigma I_{xx}(t) + (1 - \sigma)\lambda_{xx}(t)[N_{xx}^{eq} - I_{xx}(t)] - (1 - \sigma)\nu I_{xx}(t) + \tau I_{xy}(t), \quad (\text{S5})$$

where the form of the force of infection  $\lambda_{xx}(t)$  is based on Eq.(3) (main text) under the type-I scenario and Eq.(7) under the type-II scenario, while the first term on the right-hand side (r.h.s.) of this equation considers the diffusion of infectious individuals from subgroup  $N_{xx}$ , the second term on the r.h.s. measures the newly generated infected individuals within subgroup  $N_{xx}$ , the third term on the r.h.s. evaluates the infectious individuals that do not diffuse away from subgroup  $N_{xx}$  but experience the transition of recovery, and the last term accounts for the return of infectious individuals from subgroup  $N_{xy}$ .

Similarly, the contagion process in subgroup  $N_{yx}$  can be described by the following rate equation:

$$\frac{dI_{yx}}{dt} = -\tau I_{yx}(t) + (1 - \tau)\lambda_{yx}(t)[N_{yx}^{eq} - I_{yx}(t)] - (1 - \tau)\nu I_{yx}(t) + \sigma I_{yy}(t), \quad (\text{S6})$$

where the form of the force of infection  $\lambda_{yx}(t)$  is based on Eq.(3) under the type-I scenario and Eq.(6) under the type-II scenario, while the first term on the r.h.s. of this equation refers to the return of infectious individuals from subgroup  $N_{yx}$ , the second term on the r.h.s. considers the newly generated infected individuals within subgroup  $N_{yx}$ , the third term on the r.h.s. measures the infectious individuals that do not return to subgroup  $N_{yy}$  but experience the transition of recovery, and the last term evaluates the number of infectious commuters departing from subgroup  $N_{yy}$ .

The contagion process in subgroups  $N_{yy}, N_{xy}$  with any of the two contact scenarios can be similarly delineated by the set of rate equations:

$$\frac{dI_{yy}}{dt} = -\sigma I_{yy}(t) + (1 - \sigma)\lambda_{yy}(t)[N_{yy}^{eq} - I_{yy}(t)] - (1 - \sigma)\nu I_{yy}(t) + \tau I_{yx}(t), \quad (\text{S7})$$

$$\frac{dI_{xy}}{dt} = -\tau I_{xy}(t) + (1 - \tau)\lambda_{xy}(t)[N_{xy}^{eq} - I_{xy}(t)] - (1 - \tau)\nu I_{xy}(t) + \sigma I_{xx}(t), \quad (\text{S8})$$

where the form of  $\lambda_{yy}(t), \lambda_{xy}(t)$  is based on Eq.(2) under the type-I scenario and Eq.(5) and Eq.(4) under the type-II scenario.

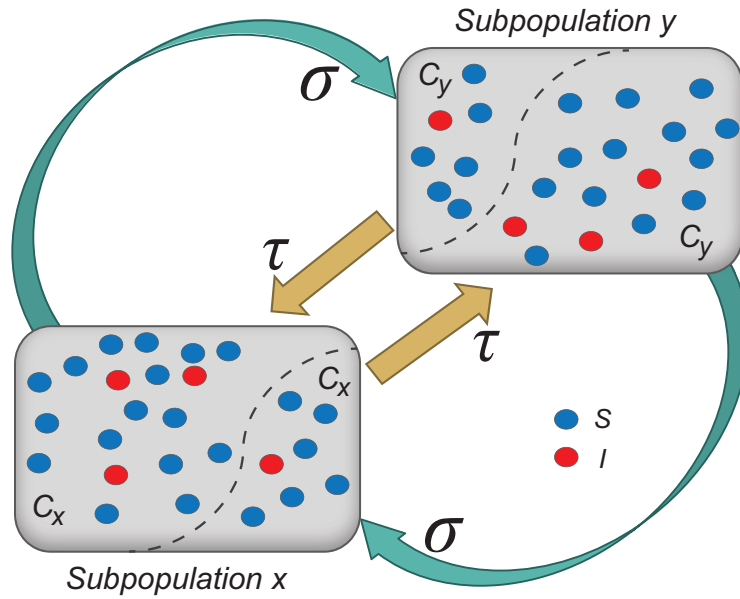

(a) Type-I (destination-driven) contact scenario

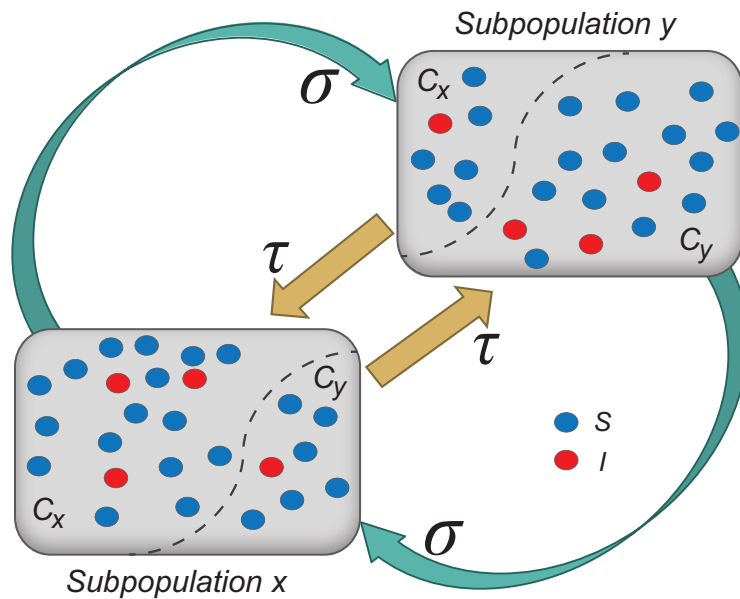

(b) Type-II (origin-driven) contact scenario

**Figure S1.** Schematic illustrations of (a) the type-I (destination-driven) contact scenario and (b) the type-II (origin-driven) contact scenario.

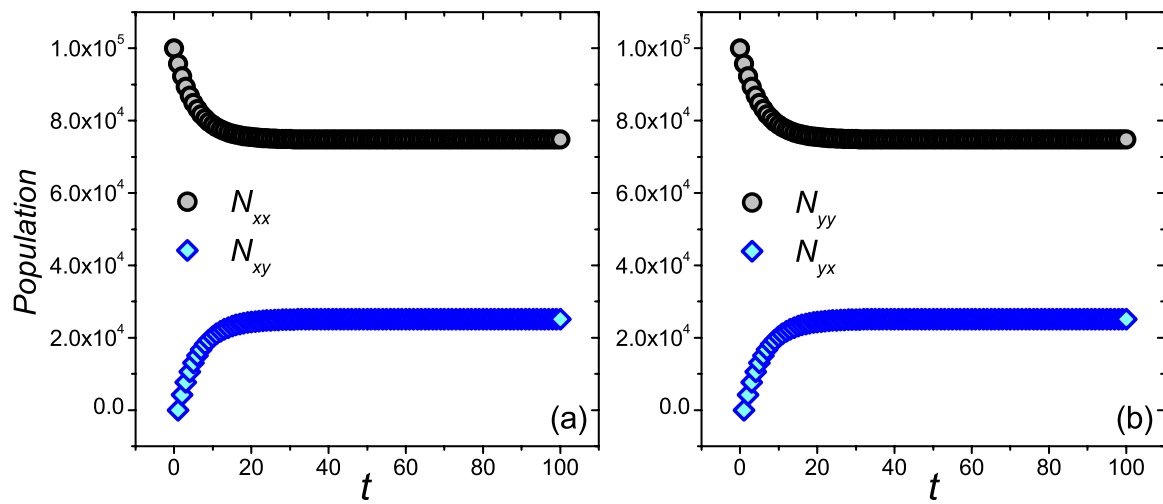

Figure S2. The time series of the population evolution in each subgroup.
